# Supplementary material for: A Major Locus on Wheat Chromosome 7B Associated With Late-Maturity α-Amylase Encodes a Putative ent-Copalyl Diphosphate Synthase
Source: Front Plant Sci. 2021 Feb 26;12:637685. doi: 10.3389/fpls.2021.637685 (PMC7952997; doi:10.3389/fpls.2021.637685)
Supplement: Supplementary file 1 [file Data_Sheet_1.xlsx]

## Sheet: Supplementary Table S1
	Supplementary Table S1. Details of the breeding lines and varieties used in the study.
	Pedigrees were sources from Genome Resources Information System for Wheat and Triticale
	(http://wheatpedigree.net/).
		Origin	Pedigree	Stature	LMA phenotype
	Chinese Spring	China	Landrace	Tall	LMA-res
	Maringa	Brazil	FRONTANA/KENYA-58//PONTA-GROSSA-1	Tall	LMA-res
	Halberd	Australia	SCIMITAR/KENYA-C-6042//BOBIN/3/INSIGNIA-49	Tall	LMA-res
	CxH93	Australia	CRANBROOK/HALBERD	Tall	LMA-res
	Spica	Australia	THREE-SEAS/KAMBOURICO//PUSA-4/FLORA	Tall	LMA-sus
	Reeves	Australia	BODALLIN//GAMENYA/INIA-66	Tall	LMA-sus
	Maris Huntsman	UK	CI-12633/5*CAPPELLE-DESPREZ//HYBRID-46,GBR/CAPPELLE-DESPREZ/3/2*PROFESSEUR-MARCHAL	Tall	LMA-sus
	Cranbrook	Australia	WREN,MEX//CIANO-67(SIB)/NOROESTE-66/3/ZAMBEZI	Semi-dwarf (Rht-B1b)	LMA-sus
	Kennedy	Australia	HARTOG/VEERY-5	Semi-dwarf (Rht-B1b)	LMA-sus
	RAC655	Australia	CHA/MENGAVI-8156//CIANO-67(SIB)/GALLO//BEZOSTAYA-2(CO-2224)/3/RAC-309-S	Semi-dwarf (Rht-D1b)	LMA-sus
	BD159	Australia	JABIRU/MILLEWA//MILLEWA/3/TM-56	Semi-dwarf (Rht-B1b)	LMA-sus
	Chara	Australia	BD-225/CD-87	Semi-dwarf (Rht-B1b)	LMA-sus
	Wyalkatchem	Australia	MACHETE/3/(84-W-129-504)GUTHA//JACUP*2/11th-ISEPTON-135	Semi-dwarf (Rht-D1b)	LMA-sus
	Janz	Australia	3-AG-3/4*CONDOR//COOK	Semi-dwarf (Rht-B1b)	LMA-res
	Hartog	Australia	VICAM-71//CIANO-67(SIB)/SIETE-CERROS-66/3/KALYANSONA/BLUEBIRD	Semi-dwarf (Rht-D1b)	LMA-res
	Seri82	Mexico	KAVKAZ/(SIB)BUHO//KALYANSONA/BLUEBIRD	Semi-dwarf (Rht-B1b)	LMA-sus
	ChuanMai18	China	69-1776/663,CHN	Semi-dwarf (Rht8)	LMA-sus
	AUS33402 (CIGM93-204)	Mexico	CETA/Ae.tauschii	Tall (synthetic hexaploid)	LMA-sus

## Sheet: Supplementary Table S2
	Supplementary Table S2 – KASP™ primers used for fine mapping
	Kasp Marker	Primer_AlleleX	Primer_AlleleY	Primer_Common
	CAT	GAAGGTGACCAAGTTCATGCTAATCTCATCTGAAAAGGACAACATCG	GAAGGTCGGAGTCAACGGATTAATAATCTCATCTGAAAAGGACAACATCA	GAGGTACTAATGCTCATTCTTAATGTTGTA
	PPK	GAAGGTGACCAAGTTCATGCTCCAATACTATCATCTCACCAGTCAT	GAAGGTCGGAGTCAACGGATTCCAATACTATCATCTCACCAGTCAC	GTACTTGCCAAGAAGGCCATACATATAAT
	CRF	GAAGGTGACCAAGTTCATGCTAACCCTTATTCTTGATTCGCACGG	GAAGGTCGGAGTCAACGGATTGTAACCCTTATTCTTGATTCGCACGA	GGAGGAGGTGGGGGGCCTA
	SPA	GAAGGTGACCAAGTTCATGCTGACCATTGATGATGCAGTTCTCCA	GAAGGTCGGAGTCAACGGATTACCATTGATGATGCAGTTCTCCG	AGTGGAACAGCACGATGTCGAAGTT
	UN2	GAAGGTGACCAAGTTCATGCTCTTAGGCTCTTACTGTCTGTTAG	GAAGGTCGGAGTCAACGGATTCTCTTAGGCTCTTACTGTCTGTTAC	GCAGTGGTGGTTGCTCGTGGAA
	SOS1	GAAGGTGACCAAGTTCATGCTAACTTCCATCGTGAACCCATCACT	GAAGGTCGGAGTCAACGGATTCTTCCATCGTGAACCCATCACC	AACATTGTTACGCTAGACCTTGTAGAGTA
	SNP1	GAAGGTGACCAAGTTCATGCTGGTTCATCTGTGTACCAGAGGTTT	GAAGGTCGGAGTCAACGGATTGTTCATCTGTGTACCAGAGGTTG	TAGAATTGAATGACAACAGTGGGTCTGAA
	SC111 s22	GAAGGTGACCAAGTTCATGCTGTTGGCTTCACTCCTAGTGGGT	GAAGGTCGGAGTCAACGGATTGGCTTCACTCCTAGTGGGC	CTGGCTCAGGAACACTTTACTTCGAT
	SNP2	GAAGGTGACCAAGTTCATGCTCCGTCCCTGCCTCTGTCCA	GAAGGTCGGAGTCAACGGATTCGTCCCTGCCTCTGTCCG	TCCACCTTCGAGAAGCAGTATCGAT
	SNP3	GAAGGTGACCAAGTTCATGCTATAATTTTAGGAATCAACTGCCCAA	GAAGGTCGGAGTCAACGGATTCTATAATTTTAGGAATCAACTGCCCAG	GTCTTGAAAGCATTCCCTGTTGTATCAAT
	SNP4	GAAGGTGACCAAGTTCATGCTCGATGGCAGAGTGGCCAGAT	GAAGGTCGGAGTCAACGGATTCGATGGCAGAGTGGCCAGAC	TCCACAGGTCCGTCTTCAGATTATATTTA
	SNP5	GAAGGTGACCAAGTTCATGCTGCAGCTATGAGGATGATCCTCG	GAAGGTCGGAGTCAACGGATTGGCAGCTATGAGGATGATCCTCA	CAACTATACGGACTCCGTCCAGAA
	SNP6	GAAGGTGACCAAGTTCATGCTCAACTTTAACTTAGCAAGTTCAACATCAG	GAAGGTCGGAGTCAACGGATTCAACTTTAACTTAGCAAGTTCAACATCAC	AAACGAGGAGCGTGCCGCCAA
	SNP7	GAAGGTGACCAAGTTCATGCTCACGCTCGAGTACTGGGAGGT	GAAGGTCGGAGTCAACGGATTCCACGCTCGAGTACTGGGAGGC	TCGTACCTAAGGAACAGCACCTGAT
	SNP8	GAAGGTGACCAAGTTCATGCTGTTCTACATACCGATTTGGCCCG	GAAGGTCGGAGTCAACGGATTGTTCTACATACCGATTTGGCCCA	AGTGGGCCGACCCATTATATGGTTT
	SNP9	GAAGGTGACCAAGTTCATGCTCATGGATGCAGGCTCAAGGTCA	GAAGGTCGGAGTCAACGGATTATGGATGCAGGCTCAAGGTCG	TGGCCGTCGGGCCCTGGTT
	HMG s3	GAAGGTGACCAAGTTCATGCTCTATCCTGTAGAGGTAGCCAAATC	GAAGGTCGGAGTCAACGGATTGTCTATCCTGTAGAGGTAGCCAAATT	CAGTCTAAGATTCAAGACATCTTGATTATT
	SNP10	GAAGGTGACCAAGTTCATGCTGCCTTTGCAGCGTGGCTGG	GAAGGTCGGAGTCAACGGATTCGCCTTTGCAGCGTGGCTGA	CGCTTCCGGTCCAACAGGATCAA
	SNP11	GAAGGTGACCAAGTTCATGCTGATGTGCTCCAACGTATGATCAAGAT	GAAGGTCGGAGTCAACGGATTATGTGCTCCAACGTATGATCAAGAC	ATCGCCAACCAGAGGATGATGCAT
	SNP12	GAAGGTGACCAAGTTCATGCTGGGGTGATCTAGCATCACTTCCT	GAAGGTCGGAGTCAACGGATTGGGTGATCTAGCATCACTTCCC	CAGCGCTGCCAGAAGTAGTCGAT
	SNP13	GAAGGTGACCAAGTTCATGCTCATACTGCCAAGCATGCTACTCTAAT	GAAGGTCGGAGTCAACGGATTCATACTGCCAAGCATGCTACTCTAAA	GGATGGACTAGGAAATGTACATATCTGTT
	SNP14	GAAGGTGACCAAGTTCATGCTAGTGAGTTCCAAATATTTACATTTGTCTAAAT	GAAGGTCGGAGTCAACGGATTAGTGAGTTCCAAATATTTACATTTGTCTAAAA	TGGAGGTTGTGATACTCCTGAAATAAGAA
	SNP15	GAAGGTGACCAAGTTCATGCTGATTTGATCATATTCTTCCGTCGACT	GAAGGTCGGAGTCAACGGATTTGATCATATTCTTCCGTCGACG	AGTTCTTTCAACGGAGGGCAAGCAT
	SNP16	GAAGGTGACCAAGTTCATGCTATATACTCATTTAACGTTCTTCAAACACG	GAAGGTCGGAGTCAACGGATTCATATACTCATTTAACGTTCTTCAAACACA	TGGCACAACATATATCTGAAAAATGGCAAT
	SNP17	GAAGGTGACCAAGTTCATGCTGGTCATAGGCCTTCATCATATCCAA	GAAGGTCGGAGTCAACGGATTGTCATAGGCCTTCATCATATCCAG	CCCAACGGAATAGATATTGTGCCGTA
	CPS2 s8	GAAGGTGACCAAGTTCATGCTATGAGAAATGCTTCGAATACATCGACT	GAAGGTCGGAGTCAACGGATTATGAGAAATGCTTCGAATACATCGACA	TCTTACCTCCGTTGAATTTCTTGACGATT
	SNP18	GAAGGTGACCAAGTTCATGCTGACTTATGGTCCGTCTATATTCAAGTTA	GAAGGTCGGAGTCAACGGATTGACTTATGGTCCGTCTATATTCAAGTTT	GCTAAATTTGAGATGACTCGTTACTGTCTT
	SNP19	GAAGGTGACCAAGTTCATGCTAGCTGACATTTTGAGATGATAAAAAAATCATTA	GAAGGTCGGAGTCAACGGATTGCTGACATTTTGAGATGATAAAAAAATCATTG	GCTTCACTGATCTAGTAGGACTTAAAGTT
	SNP20	GAAGGTGACCAAGTTCATGCTGTTCGAGATGATGCAGTCCTTCT	GAAGGTCGGAGTCAACGGATTGTTCGAGATGATGCAGTCCTTCC	GGTGAAGTAAAATCCACATTGGTCATCTT
	SNP21	GAAGGTGACCAAGTTCATGCTTAGTTTAAAAAGATCGTAGTCAGCGC	GAAGGTCGGAGTCAACGGATTGTTAGTTTAAAAAGATCGTAGTCAGCGT	CTCCACAATAATGCTAAACATACAAAGGTT
	SNP22	GAAGGTGACCAAGTTCATGCTGTGCTCTGATCTAAACTTTAATTAGCTGT	GAAGGTCGGAGTCAACGGATTGCTCTGATCTAAACTTTAATTAGCTGC	GGTTGCGTTCATATATGGAAGATAAAGTTA
	SNP23	GAAGGTGACCAAGTTCATGCTAGTTCTTACTGTATGTATTTGCTCAAATAC	GAAGGTCGGAGTCAACGGATTAAGTTCTTACTGTATGTATTTGCTCAAATAT	GAGTCCCATTTAAAACCATGTACTTGCTA
	CPS1 s14	GAAGGTGACCAAGTTCATGCTTTCTCCCACCCTTTTCTTCTTCC	GAAGGTCGGAGTCAACGGATTCTTTCTCCCACCCTTTTCTTCTTCT	TGTGCGGTGCAGTGCAATGCATATA
	MATE1	GAAGGTGACCAAGTTCATGCTCATGTCATCAAACAAGAATGCCACG	GAAGGTCGGAGTCAACGGATTGCATGTCATCAAACAAGAATGCCACA	AGGAAGTGGTGGAGTACATTTCAAAAAT
	MYB	GAAGGTGACCAAGTTCATGCTCGAGAGACTTCGTACGTCTTGG	GAAGGTCGGAGTCAACGGATTCGAGAGACTTCGTACGTCTTGA	CATGACAAGCACATTACTAATTGTTCGCAA
	coGST	GAAGGTGACCAAGTTCATGCTGCAAGCCCACACTAGACGCG	GAAGGTCGGAGTCAACGGATTGCAAGCCCACACTAGACGCA	AGATTGCGAGTTGACGATGGGCTTA
	MATE2	GAAGGTGACCAAGTTCATGCTAATTGTGTTGTCGAATGATGTTACCTG	GAAGGTCGGAGTCAACGGATTCAATTGTGTTGTCGAATGATGTTACCTA	CTGCCTCCCCGTGTTACAATTATGTA

## Sheet: Supplementary Table S3
	Supplementary Table S4: Prediction of Variant effects
	Non-synonymous substitutions in the modelled part of the LMA-1 protein were submitted to prediction programs for evaluation
	Deleterious predictions with high prediction accuracies (e.g. greater than 70%) are shown in bold
			SNAP2 Predictions				PROVEAN Predictions			PredictSNP Predictions																	Phyre2		Missense3D
	Representative variety	Variant	Predicted effect	Score	Expected accuracy		PROVEAN score	Prediction (cutoff= -2.5)		PredictSNP prediction	PredictSNP expected accuracy	MAPP prediction	MAPP expected accuracy	PhD-SNP prediction	PhD-SNP expected accuracy	PolyPhen-1 prediction	PolyPhen-1 expected accuracy	PolyPhen-2 prediction	PolyPhen-2 expected accuracy	SIFT prediction	SIFT expected accuracy	SNAP prediction	SNAP expected accuracy	PANTHER prediction	PANTHER expected accuracy		mutation sensitivity (8-high,1-low)		Modelling result
	Halberd	C135G	Neutral	-61	0.82		3.183	Neutral		Neutral	0.75204	Neutral	0.788546	Neutral	0.660879	Deleterious	0.744912	Neutral	0.87309	Neutral	0.835263	Neutral	0.611679	Deleterious	0.61		1
	Halberd	S137R	Neutral	-64	0.82		-0.983	Neutral		Neutral	0.826225	Neutral	0.704897	Neutral	0.832104	Neutral	0.668841	Neutral	0.87309	Neutral	0.896715	Neutral	0.611979	Neutral	0.548198		1
	Maringa	W157C	effect	82	0.91		-11.44	Deleterious		Deleterious	0.869084	Deleterious	0.766117	Deleterious	0.88475	Deleterious	0.744912	Deleterious	0.811429	Deleterious	0.792808	Deleterious	0.869565	Deleterious	0.874251		8		no structural damage
	Halberd	Q168R	Neutral	-36	0.66		3.52	Neutral		Neutral	0.738345	Neutral	0.795595	Neutral	0.892455	Deleterious	0.59445	Neutral	0.87309	Neutral	0.896705	Neutral	0.830588	Deleterious	0.566866		4
	Halberd	I170T	Neutral	-41	0.72		-3.222	Deleterious		Neutral	0.736888	Neutral	0.704846	Neutral	0.68184	Neutral	0.668841	Neutral	0.74975	Neutral	0.699911	Deleterious	0.555519	Neutral	0.548088		4
	Halberd	V200M	Neutral	-94	0.97		0.357	Neutral		Neutral	0.826225	Neutral	0.710132	Neutral	0.832104	Neutral	0.668841	Neutral	0.87309	Neutral	0.869101	Neutral	0.830588	Neutral	0.699074		3
	Halberd	E308A	Neutral	-78	0.87		-2.093	Neutral		Neutral	0.826225	Neutral	0.677817	Neutral	0.660879	Neutral	0.668841	Neutral	0.789289	Neutral	0.769368	Neutral	0.611679	Neutral	0.711806		1
	Halberd	E312K	Neutral	-36	0.66		-0.092	Neutral		Neutral	0.736888	Neutral	0.770044	Deleterious	0.607981	Neutral	0.668841	Neutral	0.643644	Neutral	0.822954	Neutral	0.768234	Neutral	0.650058		2
	Halberd	V318I	Neutral	-52	0.78		-0.501	Neutral		Neutral	0.826225	Neutral	0.851101	Neutral	0.832104	Neutral	0.668841	Neutral	0.627628	Neutral	0.748887	Neutral	0.768234	Neutral	0.635417		4
	Halberd	V324E	effect	66	0.8		-4.989	Deleterious		Deleterious	0.869084	Deleterious	0.718141	Deleterious	0.88475	Deleterious	0.744912	Deleterious	0.811429	Deleterious	0.792808	Deleterious	0.848454	Deleterious	0.744511		5		damaging
	Halberd	N326T	Neutral	-31	0.66		-4.417	Deleterious		Neutral	0.738345	Neutral	0.761233	Neutral	0.58231	Neutral	0.668841	Neutral	0.643644	Deleterious	0.45233	Neutral	0.611679	Neutral	0.711806		3		no structural damage
	Halberd	D331G	effect	49	0.71		-6.706	Deleterious		Deleterious	0.869084	Deleterious	0.55997	Deleterious	0.88475	Deleterious	0.59445	Deleterious	0.649743	Deleterious	0.792808	Deleterious	0.720388	Deleterious	0.61		5		damaging
	ChuanMai 18	D360E	effect	1	0.53		-1.953	Neutral		Neutral	0.738345	Neutral	0.704846	Neutral	0.832104	Neutral	0.668841	Deleterious	0.431234	Neutral	0.756901	Neutral	0.768234	Deleterious	0.678		1
	Halberd	H446R	Neutral	-88	0.93		0.817	Neutral		Neutral	0.826225	Neutral	0.642291	Neutral	0.552027	Neutral	0.668841	Neutral	0.87309	Neutral	0.869101	Neutral	0.830588	Neutral	0.484357		2
	Halberd	E459D	effect	46	0.71		-2.106	Neutral		Neutral	0.614219	Deleterious	0.409295	Neutral	0.58231	Neutral	0.668841	Deleterious	0.398458	Deleterious	0.459498	Neutral	0.768234	Neutral	0.563657		2		no structural damage
	Halberd	R461H	Neutral	-34	0.66		-0.516	Neutral		Neutral	0.826225	Neutral	0.74185	Neutral	0.832104	Neutral	0.668841	Neutral	0.87309	Neutral	0.713268	Neutral	0.665242	Neutral	0.561993		2
	Halberd	V493A	effect	34	0.66		-3.722	Deleterious		Deleterious	0.654946	Deleterious	0.409295	Deleterious	0.773385	Neutral	0.668841	Deleterious	0.474293	Deleterious	0.792808	Deleterious	0.555519	Neutral	0.548088		4		damaging
	ChuanMai 18	L595R	effect	59	0.75		-5.447	Deleterious		Deleterious	0.869084	Deleterious	0.55997	Deleterious	0.88475	Deleterious	0.744912	Deleterious	0.811429	Deleterious	0.792808	Deleterious	0.885196	Deleterious	0.744511		5		damaging
	Spica	S620G	Neutral	-88	0.93		-0.448	Neutral		Neutral	0.826225	- -	- -	Neutral	0.892455	Neutral	0.668841	Neutral	0.87309	Neutral	0.758007	Neutral	0.665242	Neutral	0.483198		3
	Halberd	F688C	Neutral	-65	0.82		0.261	Neutral		Neutral	0.826225	Neutral	0.722467	Neutral	0.718714	Neutral	0.668841	Neutral	0.789289	Neutral	0.822954	Neutral	0.665242	Neutral	0.561993		4
	Halberd	G689S	Neutral	-93	0.97		-1.146	Neutral		Neutral	0.826225	Neutral	0.696916	Neutral	0.832104	Neutral	0.668841	Neutral	0.87309	Neutral	0.736655	Neutral	0.665242	Neutral	0.665509		2
	Halberd	P697S	Neutral	-89	0.93		0.475	Neutral		Neutral	0.826225	Neutral	0.642291	Neutral	0.832104	Neutral	0.668841	Neutral	0.676353	Neutral	0.756901	Neutral	0.583594	Neutral	0.650058		4
	Halberd	G732D	effect	10	0.59		0.039	Neutral		Neutral	0.736888	Neutral	0.642291	Neutral	0.782876	Neutral	0.668841	Neutral	0.711712	Neutral	0.713268	Deleterious	0.555519	Deleterious	0.662		3
	Halberd	R769I	Neutral	-36	0.66		-2.017	Neutral		Neutral	0.738345	Neutral	0.851101	Neutral	0.832104	Neutral	0.668841	Neutral	0.74975	Deleterious	0.527785	Neutral	0.500147	Neutral	0.563657		1
	Halberd	A784E	Neutral	-70	0.82		1.088	Neutral		Neutral	0.826225	Neutral	0.734802	Neutral	0.832104	Neutral	0.668841	Neutral	0.87309	Neutral	0.869101	Neutral	0.830588	Neutral	0.515046		2
	Halberd	T789A	Neutral	-25	0.61		-0.514	Neutral		Neutral	0.738345	Deleterious	0.483508	Neutral	0.892455	Neutral	0.668841	Neutral	0.87309	Neutral	0.726625	Neutral	0.708784	Neutral	0.643519		1
	Halberd	D792E	Neutral	-48	0.72		-0.233	Neutral		Neutral	0.748252	Deleterious	0.409295	Neutral	0.892455	Neutral	0.668841	Neutral	0.87309	Neutral	0.896705	Neutral	0.768234	Neutral	0.670915		1
	Halberd	Q795R	Neutral	-72	0.87		-1.734	Neutral		Neutral	0.826225	Neutral	0.734802	Neutral	0.832104	Neutral	0.668841	Neutral	0.740741	Neutral	0.726625	Neutral	0.583594	Neutral	0.616454		4

## Sheet: Supplementary Table S4
	Supplementary Table S3 – KASP™ primers used for LMA-1 genotyping
	Allele	Primer allele X	Primer allele y	Primer common
	A	GAAGGTGACCAAGTTCATGCTATGAGAAATGCTTCGAATACATCGACT	GAAGGTCGGAGTCAACGGATTATGAGAAATGCTTCGAATACATCGACA	TCTTACCTCCGTTGAATTTCTTGACGATT
	B	GAAGGTGACCAAGTTCATGCTGAACAGGGCAGCGTCTCCC	GAAGGTCGGAGTCAACGGATTGAACAGGGCAGCGTCTCCG	CACCACCCTCCGGTGGATTCTT
	C	GAAGGTGACCAAGTTCATGCTACAAGATCACCGGGTCCCAGA	GAAGGTCGGAGTCAACGGATTCAAGATCACCGGGTCCCAGC	CCAGTGCTAATGGTATCGTTGCCTT
	D	GAAGGTGACCAAGTTCATGCTTTGGTTCCAATTGTTTCTTTCTTGG	GAAGGTCGGAGTCAACGGATTTCTTTGGTTCCAATTGTTTCTTTCTTGA	GCAAATAGTGATAAAAAACCACGAAGAAAA
	E	GAAGGTGACCAAGTTCATGCTCGCCGTTCTCGTTTGTTTCGC	GAAGGTCGGAGTCAACGGATTGCGCCGTTCTCGTTTGTTTCGT	GGCAAGGGTGGCAGCTAAGGAA
	F	GAAGGTGACCAAGTTCATGCTGCACATCGAGGCATTATTATTCTAGTTA	GAAGGTCGGAGTCAACGGATTCACATCGAGGCATTATTATTCTAGTTG	GCGCAAGACATCGCATCCATTTTGAA
	G	GAAGGTGACCAAGTTCATGCTCCCAATCTCAGTCTGTATAACTTGAATA	GAAGGTCGGAGTCAACGGATTCCCAATCTCAGTCTGTATAACTTGAATT	GCTCCAGGTCAGTTTACGTGATTGTA
	H	GAAGGTGACCAAGTTCATGCTCAAGATAAGCACAAAATGTTTCAGGC	GAAGGTCGGAGTCAACGGATTAAATCAAGATAAGCACAAAATGTTTCAGGA	CCTCAAAATAACGTCCATGGTTTTCCAAA
	I	GAAGGTGACCAAGTTCATGCTGCAAACATATATTTGAGCGTAAAAGAGC	GAAGGTCGGAGTCAACGGATTGCAAACATATATTTGAGCGTAAAAGAGG	TTCACCACAAGATGTTACTTTCTGAGGTA

## Sheet: Supplementary Table S5
	Supplementary Table S5: Comparison of models returned from Missense3D to that of Spica
		Residues within 4 Angstrom distance		Polar interactions
	Variant	Wildtype AA	Variant AA	Wildtype AA	Variant AA
	W157C	A120,W146,I147,L148,N150,Q151,S156,G158,Q168,N171,T172,C175	A120,D149,S156,G158,Q168,N171,T172,C175	T172	N171,T172
	V324E	V118,S119,T123,P295,I317,F321,G323,P325,Y328	V118,S119,D122,T123,V126,P295,I317,G323,P325	S119,T123	S119,T123; more interactions
	D331G	M111,S112 ,D113,G114 ,P229,V330,L332,F333,E334,W373,A374,R375	D113,P229,V330,L332,F333,E334,R335,W373,A374,R375	D113,P329	D113,P329; fewer interactions
	V493A	Y480,L490,P491,R492,E494,A495,R496,V497	Y480,L490,P491,R492,E494,A495,R496,V497	L490,V497	L490,V497
	L595R	K591,V592,S593,V594, A596, N597, I598, I599, F644	K591,V592,S593,V594,A596,N597, I598,I599,F644,L647,W673	K591, I599	K591, I599

## Sheet: Supplementary Table S6
Supplementary Table S6
Round 1: Cool shock LMA induction in 216 wheat varieties in glasshouse 1 in winter.
Round 2: Control (no cool shock) and cool shock LMA induction in 153 wheat varieties in glasshouse 2 in summer.
Round 3. LMA induced in 76 wheat varieties grown cool (< 23°) daily maximum temperature in glasshouse 2.
Bold lines were included in the gene capture experiment and the LMA-1 gene was therefore fully sequenced; all other varieties were genotyped using KASP markers only.
OD values are the mean of two replicate pots, rounds 1 and 2, and 5 replicate pots round 3.
Rht alleles: rht = Rht B1a[A], Rht D1a [A]; Rht1 = Rht B1b [B], Rht D1a [A]; Rht 2 = Rht B1a [A], Rht D1b [B]
nd = no data available
Name	Country	Rht allele		LMA-1 allele		High pI α-amylase content (ELISA OD)
					Round 1 (winter)	Round 2 (summer)		Round 3 (continuous cool)
					Glasshouse 1	Glasshouse 1		Glasshouse 2
		Rht B1	Rht D1			Control (non-treated)	Cool shock treated
Calingiri	Australia	B	A	A	0.0925	0.065	0.098	0.0928512
Chinese Spring	China	A	A	A	0.06775	0.068	0.483375	0.07125
Fortune	Australia	B	A	A	0.093875	0.116	0.4535	0.087625
Supreme	Australia	B	B	A	0.259125	0.082	0.13675	0.112625
SW95-50213	China	A	A	A	0.068375	0.067	0.14025	0.04225
AC Barrie	Canada	A	A	B	0.0845	0.104	0.212	0.057
AC Crystal	Canada	A	B	B	0.077875	0.062	0.111625
AC Foremost	Canada	A	B	B	0.091375	0.064	0.201625
AC Karma	Canada	A	B	B	0.075875	0.072	0.258375
AC Vista	Canada	A	B	B	0.077	0.064	0.082625
Biggar	Canada	A	B	B	0.089	0.101	0.353
Maringa	Brazil	A	A	B	0.09725	0.055	0.53025	0.06475
Beckom	Australia	B	A	C	0.075125	0.075	0.20625	0.095
Binnu	Australia	A	B	C	0.118375	0.082	0.43075
Bremer	Australia	A	B	C	0.07225	0.065	0.1455
Cordiale	England	A	B	C	0.0975	0.083	0.215
Correll	Australia	A	B	C	0.074
Cutlass	Australia	A	B	C	0.106375	0.15	0.4105	0.112
Derrimut	Australia	B	A	C	0.069875
Espada	Australia	A	B	C	0.0735	0.068	0.47025	0.0918452
Estoc	Australia	A	B	C	0.089125
Fang	Australia	A	B	C	0.08725	0.076	0.397625
Frame	Australia	A	B	C	0.1105	0.084	0.231375
Gladius	Australia	A	B	C	0.0945			0.109
Grenade CL Plus	Australia	A	B	C	0.080875
Halberd	Australia	A	A	C	0.0795	0.062	0.289625	0.078625
Harper	Australia	A	B	C	0.090375	0.072	0.28875	0.088
Heron	Australia	A	A	C	0.102375
Humber	England	A	B	C	0.093625
Justica CL Plus	Australia	A	B	C	0.078625
Kord CL Plus	Australia	A	B	C	0.278375
Kunjin	Australia	A	B	C	0.071			0.16
Longsword	Australia	B	A	C	0.082875
LRPB Dakota	Australia	B	A	C	0.122625	0.062	0.098875
LRPB Envoy	Australia	A	B	C	0.076375			0.072
LRPB Guardian	Australia	B	A	C	0.077625	0.086	0.24325
LRPB Phantom	Australia	A	B	C	0.226125
LRPB Scout	Australia	A	B	C	0.06475			0.062
LRPB Trojan	Australia	A	B	C	0.078125	0.065	0.088	0.086
Razor CL Plus	Australia	A	B	C	0.09425	0.076	0.349
RGT Accroc	France/Australia	B	A	C	0.071875	0.059	0.086875
Sabel CL Plus	Australia	A	B	C	0.092	0.083	0.183
Scepter	Australia	B	A	C	0.09025	0.069	0.436625	0.0726875
Yitpi	Australia	nd	B	C	0.17625	0.084	0.2535	0.091125
AC Andrew	Canada	B	A	D	0.120875	0.08	0.401875
AC Eatonia	Canada	A	A	D	0.139875
AC Majestic	Canada	A	A	D	0.099875
AC Meena	Canada	B	A	D	0.073875	0.067	0.303
AC Splendor	Canada	A	A	D	0.099875
AC Taber	Canada	B	A	D	0.071875	0.099	0.354375
Columbus	Canada	A	A	D	0.10325	0.149	0.4145
DS Darwin	Australia	nd	B	D	0.08675	0.063	0.232875	0.08075
DS Pascal	Australia	A	B	D	0.119125	0.067	0.300625	0.0791667
Forrest	Australia	A	B	D	0.12975	0.061	0.11025	0.162
Infinity	Canada	A	A	D	0.157125
Inia 66	Mexico	B	A	D	0.196875	0.112	0.490875
Jade	Australia	B	A	D	0.340875	0.069	0.489625	0.104256
Laura	Canada	A	A	D	0.123
LG B53	Australia	B	A	D	0.103875	0.065	0.4265
LG Tenfour	Australia	A	B	D	0.07625	0.062	0.39275
Lillian	Canada	A	A	D	0.1275	0.082	0.338875
LRPB Lincoln	New Zealand/Australia	A	B	D	0.092625	0.072	0.469	0.0865
McKenzie	Canada	A	A	D	0.090375	0.086	0.506
Neepawa	Canada	A	A	D	0.130625	0.097	0.243625
Pastiche	England	A	B	D	0.13025	0.07	0.3325
Preston	Australia	A	B	D	0.099125	0.073	0.2805	0.110625
Roblin	Canada	A	A	D	0.10825			0.0795417
SF Adagio	France/Australia	B	A	D	0.29675	0.105	0.362625
Snowstar	Canada	A	A	D	0.072125	0.066	0.12575
Somerset	Canada	A	A	D	0.108
AC Corrine	Canada	A	A	E	0.19875
AC Domain	Canada	A	A	E	0.072875	0.066	0.196375
AC Intrepid	Canada	A	A	E	0.1075
AC Superb	Canada	B	A	E	0.104375	0.059	0.16575
AGT Young	Australia	B	A	E	0.072	0.086	0.41625	0.0736667
Akteur	Germany	A	A	E	0.290375	0.167	0.413375
Alsen	USA	B	A	E	0.073	0.101	0.309875
Bluesky	Canada	A	A	E	0.13575
Bolac	Australia	B	A	E	0.1015	0.068	0.442375
Burnside	Canada	A	A	E	0.086625	0.14	0.580625
CDC Falcon	Canada	B	A	E	0.0985	0.122	0.42
CDC Rama	Canada	A	A	E	0.13125	0.351	0.522875
Cubus	Germany	A	B	E	0.172625	0.089	0.126
EGA Bullaring	Australia	A	B	E	0.12825	0.095	0.515	0.145
EGA Jitarning	Australia	A	B	E	0.1605	0.115	0.516375
Ford	Australia	A	A	E	nd	0.229	0.401875	0.236
Gascoigne	Australia	A	B	E	0.210125	0.075	0.484125	0.245
Harvest	Canada	A	A	E	0.089625	0.076	0.154875
Kanata	Canada	A	A	E	0.07275
Kelalac	Australia	B	A	E	0.12875	0.085	0.346	0.136
Kiora	Australia	B	A	E	0.1085	0.068	0.197875	0.199208
LG Cobalt	Australia	B	A	E	0.13225	0.076	0.5075	0.152
LRPB Beaufort	France/Australia	A	A	E	0.58525	nd	0.552625
LRPB Catalina	Australia	B	A	E	0.09025	0.075	0.47675	0.096
LRPB Lancer	Australia	nd	A	E	0.1025	0.062	0.150375	0.152185
Malacca	England	A	B	E	0.226125	0.083	0.473125	0.182333
Mansfield	New Zealand/Australia	B	A	E	0.576375	0.196	0.5295
RGT Zanzibar	Italy/Australia	nd	nd	E	0.238	nd	0.436
SEA Condamine	Australia	B	A	E	0.3125	0.096	0.350375
SF Scenario	France/Australia	A	B	E	0.32375	0.189	0.3205
Shield	Australia	A	B	E	0.117625	0.062	0.308875	0.1225
Snowbird	Canada	A	A	E	0.08725
Steel	Australia	B	A	E	0.12575	0.068	0.468625	0.126319
Stigg	England	A	B	E	0.244375
Sunguard	Australia	B	A	E	0.11775	0.072	0.4125	0.10575
Sunmate	Australia	B	A	E	0.145	0.069	0.35075	0.1215
Suntop	Australia	B	A	E	0.084375	0.072	0.483625	0.138696
Tuxedo	England	A	B	E	0.158375
Wedin	Australia	A	B	E	0.132125	0.068	0.476875	0.130717
Wildcat	Canada	A	A	E	0.175
AGT Katana	Australia	A	B	F	0.135625	0.073	0.40475	0.136464
AGT Scythe	Australia	A	B	F	0.236
Axe	Australia	A	B	F	0.122875	0.082	0.479	0.09175
Baxter	Australia	B	A	F	0.283	0.073	0.469125	0.336
BD159	Australia	B	A	F	0.174	0.126	0.590875	0.56294
Chief CL Plus	Australia	A	B	F	0.1795	nd	0.515125
Condo	Australia	B	A	F	0.098375	0.068	0.490625
Coolah	Australia	B	A	F	0.080625	0.085	0.352
Corack	Australia	A	B	F	0.405125	0.067	0.387	0.23769
Cosmick	Australia	B	A	F	0.102125	0.076	0.515375	0.126
Cranbrook	Australia	B	A	F	0.234125	0.112	0.529	0.359167
DS Faraday	Australia	B	A	F	0.092875	0.069	0.524	0.095
EGA Bonnie Rock	Australia	B	A	F	0.155625
EGA Burke	Australia	A	B	F	0.07675
EGA Eagle Rock	Australia	A	B	F	0.178625			0.263196
EGA Gregory	Australia	B	A	F	0.089375	0.064	0.30325	0.130411
EGA Kidman	Australia	B	A	F	0.1225
EGA Stampede	Australia	B	A	F	0.2805
EGA Wedgetail	Australia	B	A	F	0.06875	0.125	0.37225
EGA Wills	Australia	B	A	F	0.26
EGA Wylie	Australia	B	A	F	0.15025	nd	0.4405
Einstein	England/Australia	A	B	F	0.27825	0.192	0.480125
Elmore CL Plus	Australia	nd	A	F	0.09075
Emu Rock	Australia	A	B	F	0.0945	0.094	0.49875
GBA Hunter	Australia	B	A	F	0.093125
GBA Sapphire	Australia	B	A	F	0.093125
Hatchet CL Plus	Australia	A	B	F	0.114875	0.068	0.351125
Hydra	Australia	B	A	F	0.10575	nd	0.352875
Impose CL Plus	Australia	A	B	F	0.120125	0.076	0.557375
Janz	Australia	B	A	F	0.07825	0.062	0.17475	0.07775
Kennedy	Australia	A	B	F	0.126875	0.086	0.461	0.132256
King Rock	Australia	B	A	F	0.197875	0.072	0.492
Kukri	Australia	A	B	F	0.229625	0.065	0.44275
Livingston	Australia	B	A	F	0.065
Lorikeet	Australia	B	A	F	0.0725
LRPB Arrow	Australia	A	B	F	0.07425	0.085	0.59325
LRPB Bullet	Australia	B	A	F	0.07575	0.068	0.3955
LRPB Dart	Australia	B	A	F	0.089875
LRPB Flanker	Australia	B	A	F	0.1365	0.065	0.3485
LRPB Gauntlet	Australia	A	B	F	0.08975
LRPB Kittyhawk	Australia	B	A	F	0.146375	0.16	0.45875
LRPB Orion	Australia	A	B	F	0.1675
Magenta	Australia	A	B	F	0.151875	0.064	0.40125	0.135839
Maris Huntsman	England	A	A	F	0.5725			0.5645
Merinda	Australia	B	A	F	0.088
Mitch	Australia	B	A	F	0.104	0.072	0.386375
Ninja	Australia	A	B	F	0.1035	0.068	0.544875
RAC655	Australia	A	B	F	0.166125	0.103	0.59575	0.36553
Reeves	Australia	A	A	F	0.45225	0.22	0.509125	0.292931
RGT Calabro	France/Australia	B	A	F	0.38775	0.355	0.589875
Seri 82	Australia	B	A	F	0.5475	0.386	0.547625	0.544408
SF Hekto	France/Australia	A	B	F	0.204125	0.109	0.500125
SF Ovalo	France/Australia	A	A	F	0.5375	0.383	0.56575
South African 1166	South Africa	A	A	F	0.0845	0.078	0.391375
SQP Revenue	Australia	A	B	F	0.39975	0.351	0.55975
Sunco	Australia	B	A	F	0.076875
Sunlamb	Australia	B	A	F	0.08825	0.139	0.154625
Suntime	Australia	A	B	F	0.127	0.05	0.531375	0.340792
Sunvex	Australia	B	A	F	0.096875	0	0.3195	0.131833
Waagan	Australia	B	A	F	0.256	0.067	0.368375	0.174554
Wyalkatchem	Australia	A	B	F	0.097125	0.072	0.6085
Wylah	Australia	B	A	F	0.096375
Yandanooka	Australia	B	A	F	0.17075
Zebu	Australia	B	A	F	0.183625	0.069	0.455375
Zen	Australia	B	A	F	0.1055	0.078	0.5415	0.136958
Zippy	Australia	B	A	F	0.25225	0.085	0.45975
Chablis	England	A	A	G	0.153875
Clark's Cream	USA	A	A	G	0.266
Impress CL Plus	Australia	A	B	G	0.131	nd	0.544125
LRPB Crusader	Australia	B	A	G	0.074125
LRPB Gazelle	Australia	A	B	G	0.0815
LRPB Impala	Australia	B	A	G	0.07375	0.083	0.508625	0.0961667
LRPB Reliant	Australia	B	A	G	0.087375	0.068	0.406625	0.0943125
Manning	Australia	A	B	G	0.280375	0.25	0.349125
Option	England	A	B	G	0.30475	0.224	0.6035
Spark	England	A	A	G	0.47275	0.084	0.518125
Tammarin Rock	Australia	B	A	G	0.115625
Tennant	Australia	A	B	G	0.611125	0.39	0.569125
Tybalt	Netherlands	A	A	G	0.223
Westonia	Australia	A	B	G	0.104375	0.065	0.323125	0.171851
Xi19	Netherlands	A	B	G	0.276375
AUS1408	South Africa	A	A	H	0.09375	0.088	0.26225
AUS1410	South Africa	A	A	H	0.096375	0.133	0.483125
Brennan	Australia	A	A	H	0.22475	0.23	0.612
Buchanan	Australia	B	A	H	0.426625	0.125	0.52975	0.486
Chara	Australia	B	A	H	0.105625	0.072	0.521	0.624018
EGA Bounty	Australia	A	B	H	0.068625			0.0919405
Hartog	Australia	A	B	H	0.08425	0.068	0.48675	0.10494
LRPB Cobra	Australia	A	B	H	0.109875	0.069	0.559625
LRPB Havoc	Australia	A	B	H	0.4145	0.074	0.533375
LRPB Hornet	Australia	B	A	H	0.10075	nd	0.36825
LRPB Merlin	Australia	A	B	H	0.116125			0.487
LRPB Mustang	Australia	B	A	H	0.09125	nd	0.479125
LRPB Sentinel-3R	France/Australia	A	B	H	0.3535
LRPB Viking	Australia	B	A	H	0.361	0.068	0.596875
Pastor	Mexico	B	A	H	0.41425		0.5335
Spica	Australia	A	A	H	nd	0.323	0.586	0.55875
Sunbrook	Australia	A	B	H	0.1645	0.087	0.270625	0.196
Suneca	Australia	A	B	H	0.41525		0.57775	0.48
Sunmax	Australia	A	B	H	0.228125	0.061	0.4415
Sunzell	Australia	A	B	H	0.535625
Ventura	Australia	A	B	H	0.0815			0.088
Wallup	Australia	B	A	H	0.400875			0.535167
Whistler	Australia	A	B	H	0.072625
AC Abbey	Canada	nd	nd	I	0.081625	0.106	0.28025
ChuanMai18	China	nd	nd	I	nd		0.54375
				Median	0.1075	0.076	0.41625	0.12616
				Means	0.159166	0.102648	0.395217	0.183717
